# Supplementary material for: Minor allele of GJA1 gene polymorphism is associated with higher heart rate during atrial fibrillation
Source: PubMed Central journal article supplement (PMC7844413; doi:10.1038/s41598-021-82117-3), 2021-01-28
Supplement: 41598_2021_82117_MOESM1_ESM.pdf [file 41598_2021_82117_MOESM1_ESM.pdf]

# Minor Allele of *GJA1* Gene Polymorphism is associated with Higher Heart Rate during Atrial Fibrillation

Sho Okamura<sup>1)</sup>, Yuko Onohara<sup>1)</sup>, Hidenori Ochi<sup>2),3)</sup>, Takehito Tokuyama<sup>1)</sup>  
Naoya Hironobe<sup>1)</sup>, Yousaku Okubo<sup>1)</sup>, Yoshihiro Ikeuchi<sup>1)</sup>, Shunsuke Miyauchi<sup>1)</sup>  
Kazuaki Chayama<sup>3)</sup>, Yasuki Kihara<sup>1)</sup>, Yukiko Nakano<sup>1)</sup>

- 1) Department of Cardiovascular Medicine, Graduate School of Biomedical and Health Sciences, Hiroshima University, Japan
- 2) Department of Health Management, Hiroshima Red Cross Hospital & Atomic-bomb Survivors Hospital, Japan
- 3) Department of Gastroenterology and Metabolism, Biomedical Sciences, Graduate School of Biomedical and Health Sciences, Hiroshima University, Japan

Supplementary Figure 1. Linkage disequilibrium of the *GJA1* SNP rs1015451.

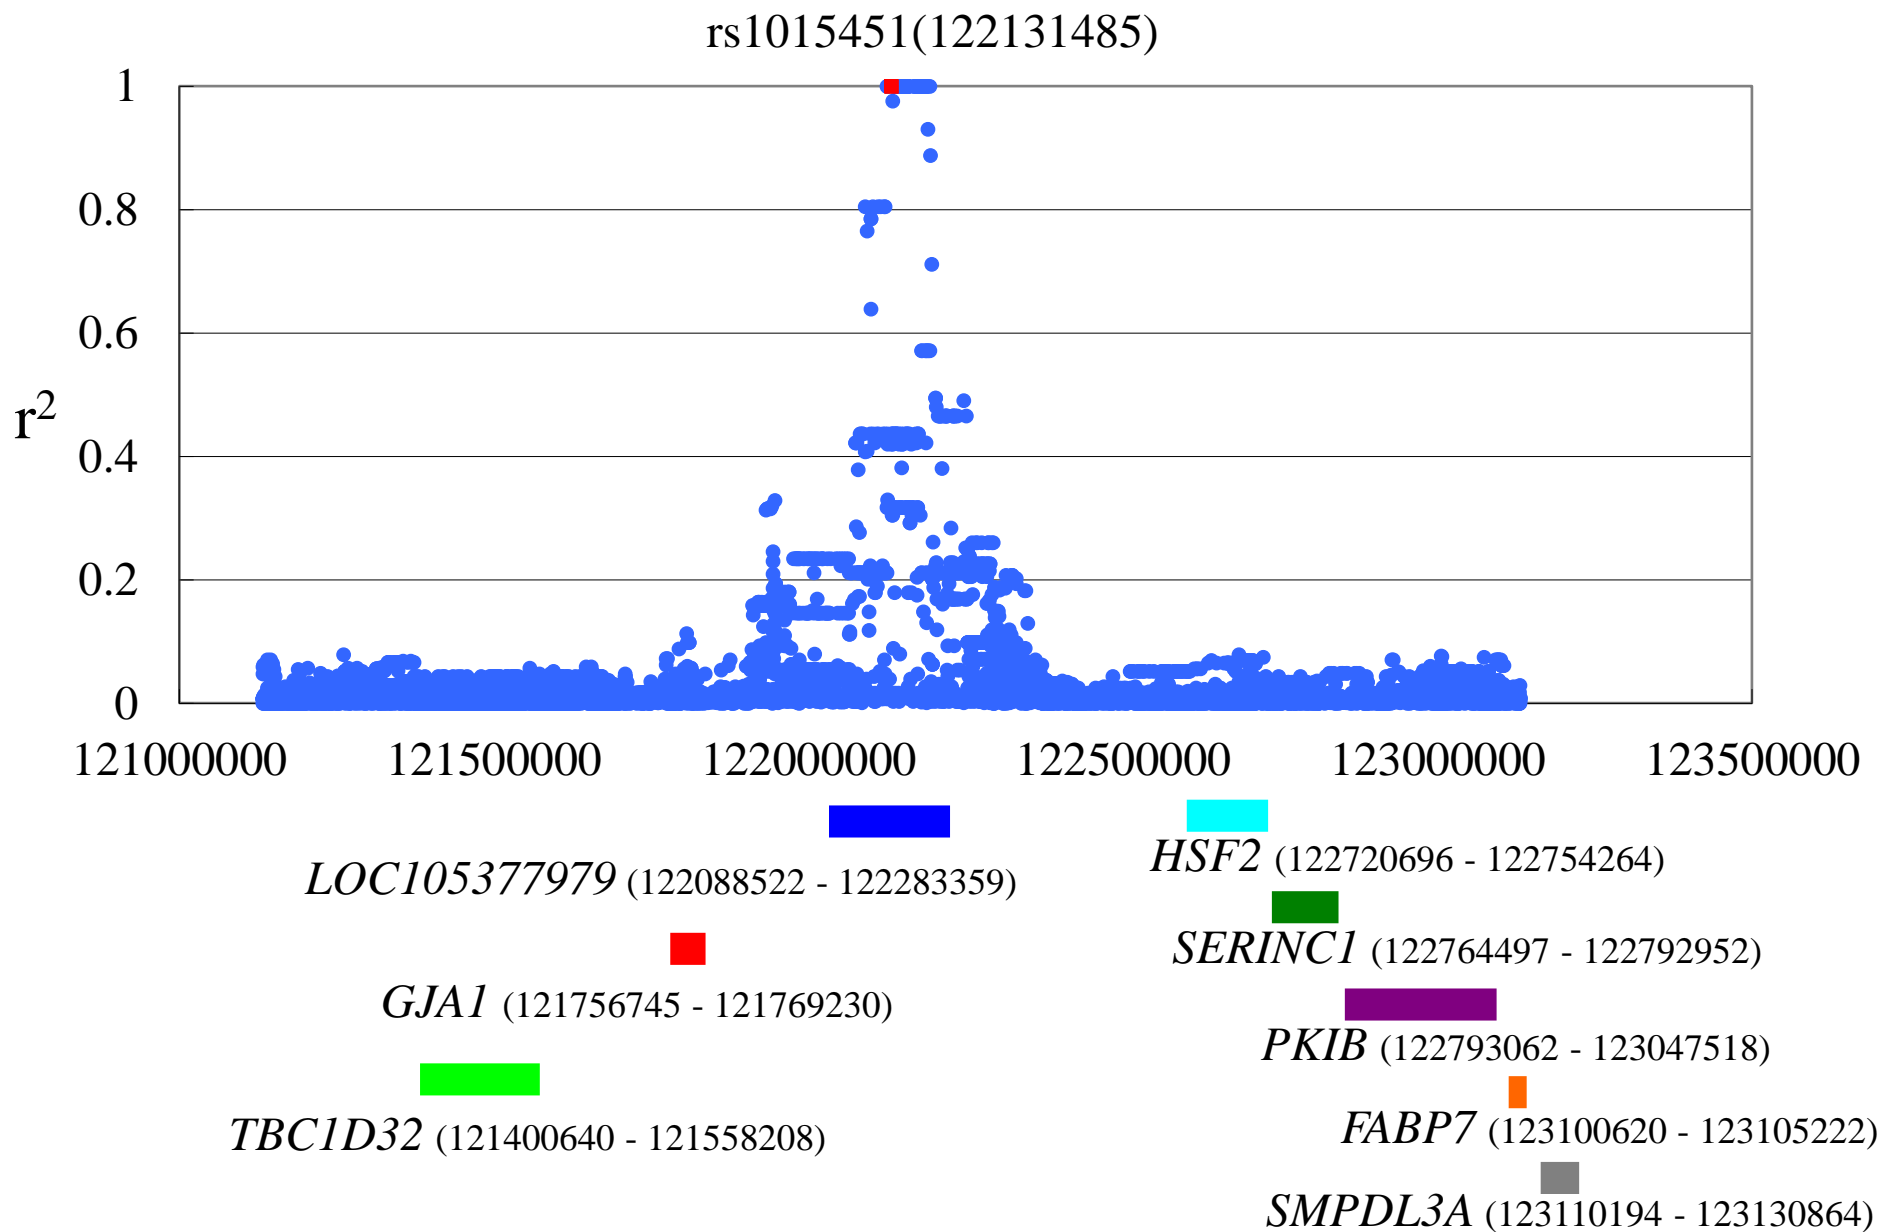

Supplementary Figure 2-1.

Relationship between the *GJA1* expression in the left ventricle and linkage disequilibrium SNPs around *GJA1* SNP rs1015451.

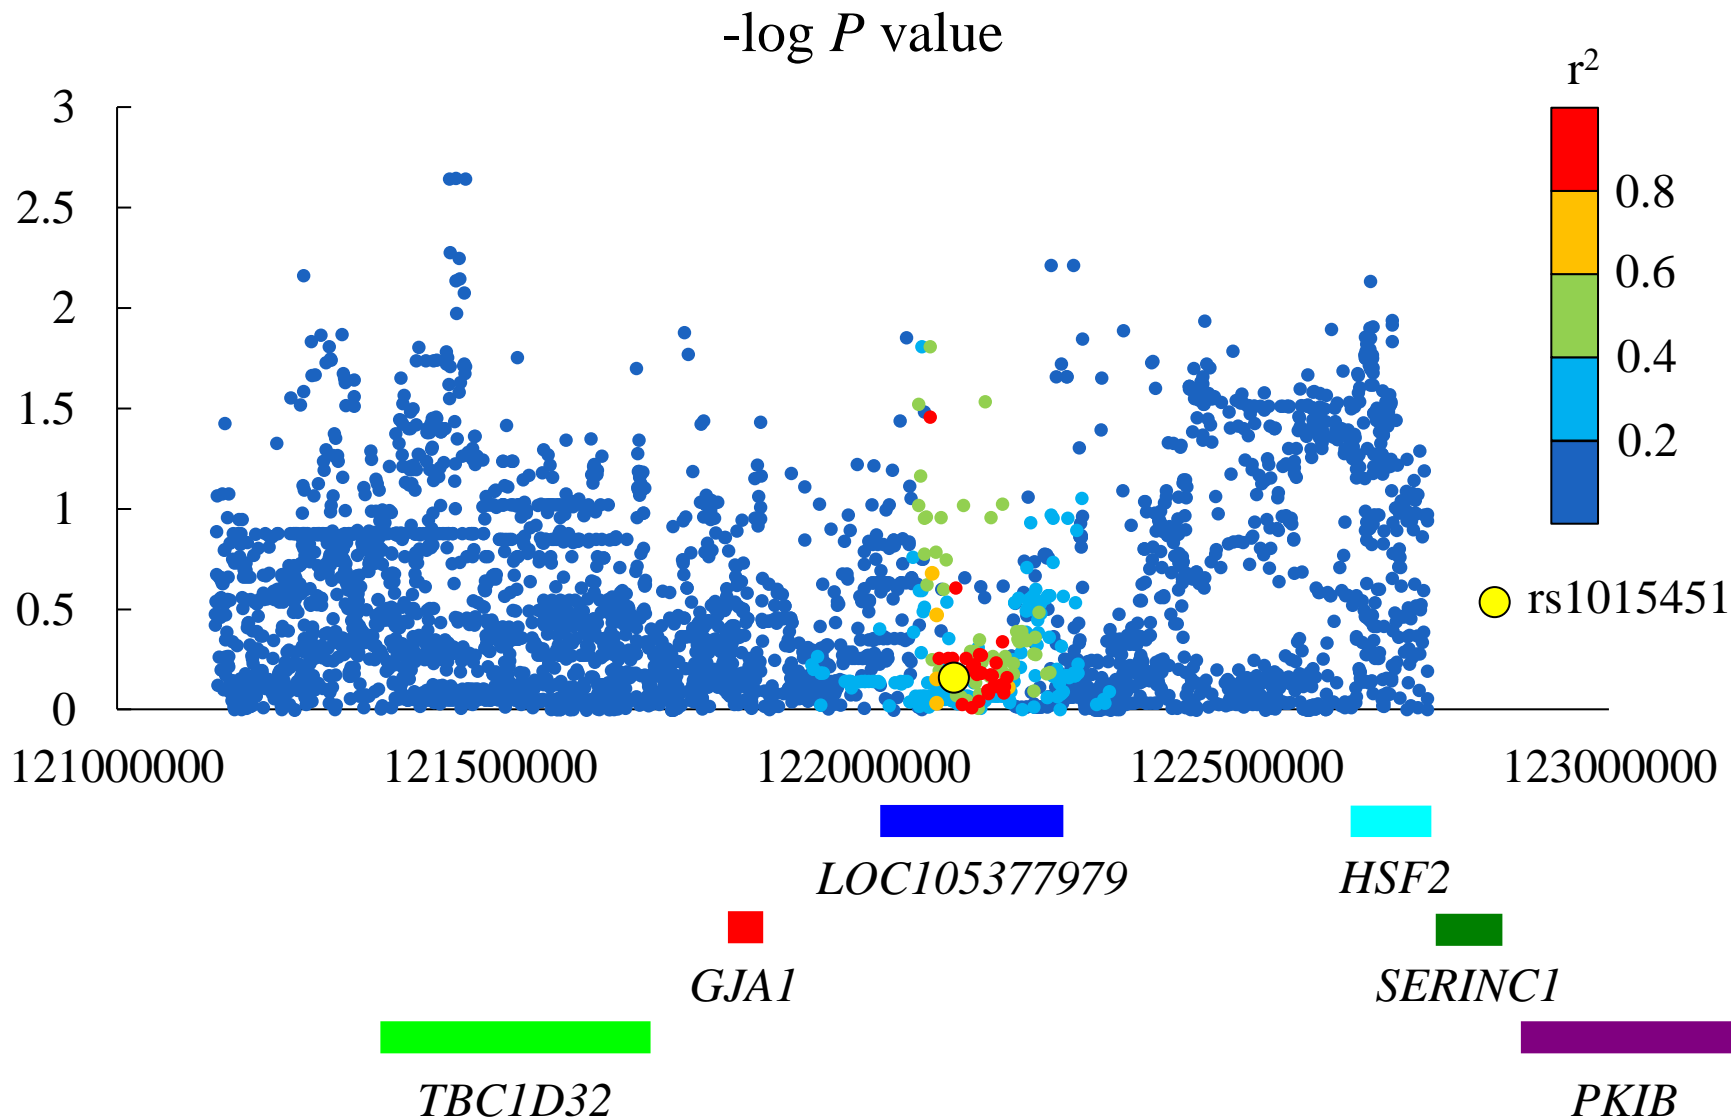

Supplementary Figure 2-2.

Relationship between the *GJA1* expression in the atrial appendage and linkage disequilibrium SNPs around *GJA1* SNP rs1015451.

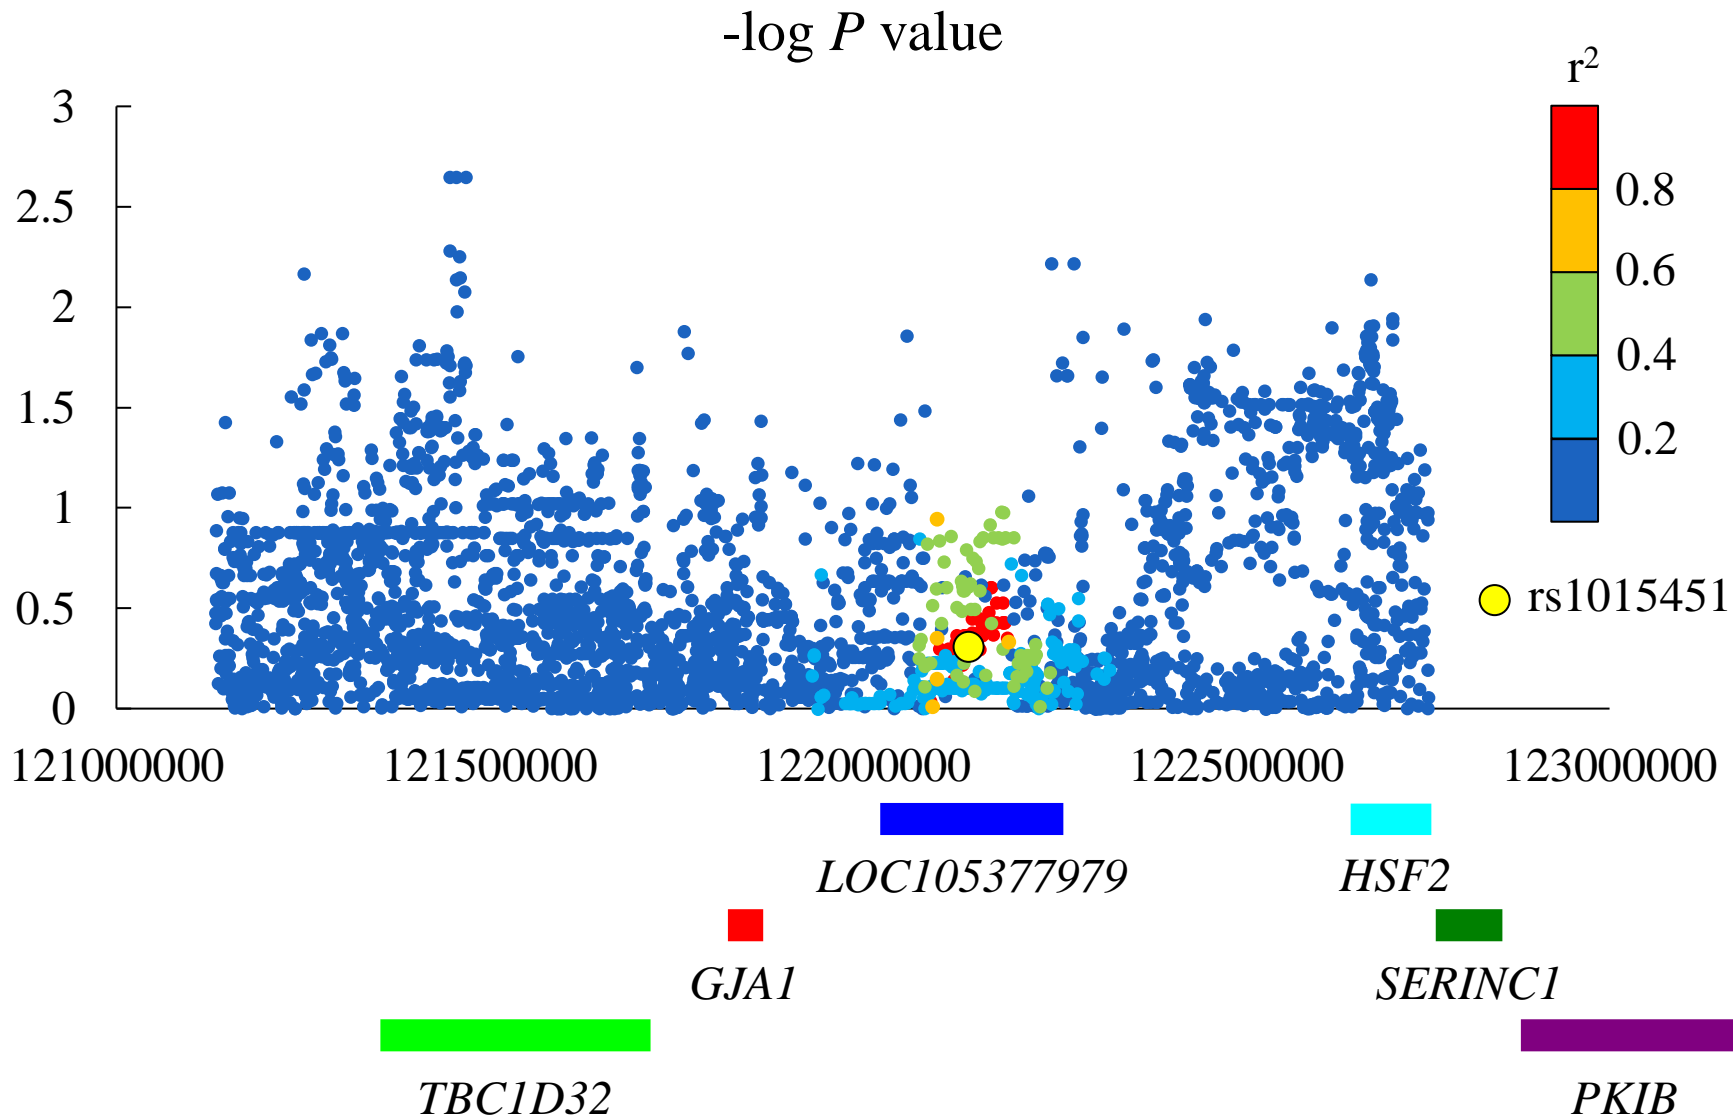

Supplementary Figure 2-3.

Relationship between the *GJA1* expression in the peripheral nerves and linkage disequilibrium SNPs around *GJA1* SNP rs1015451.

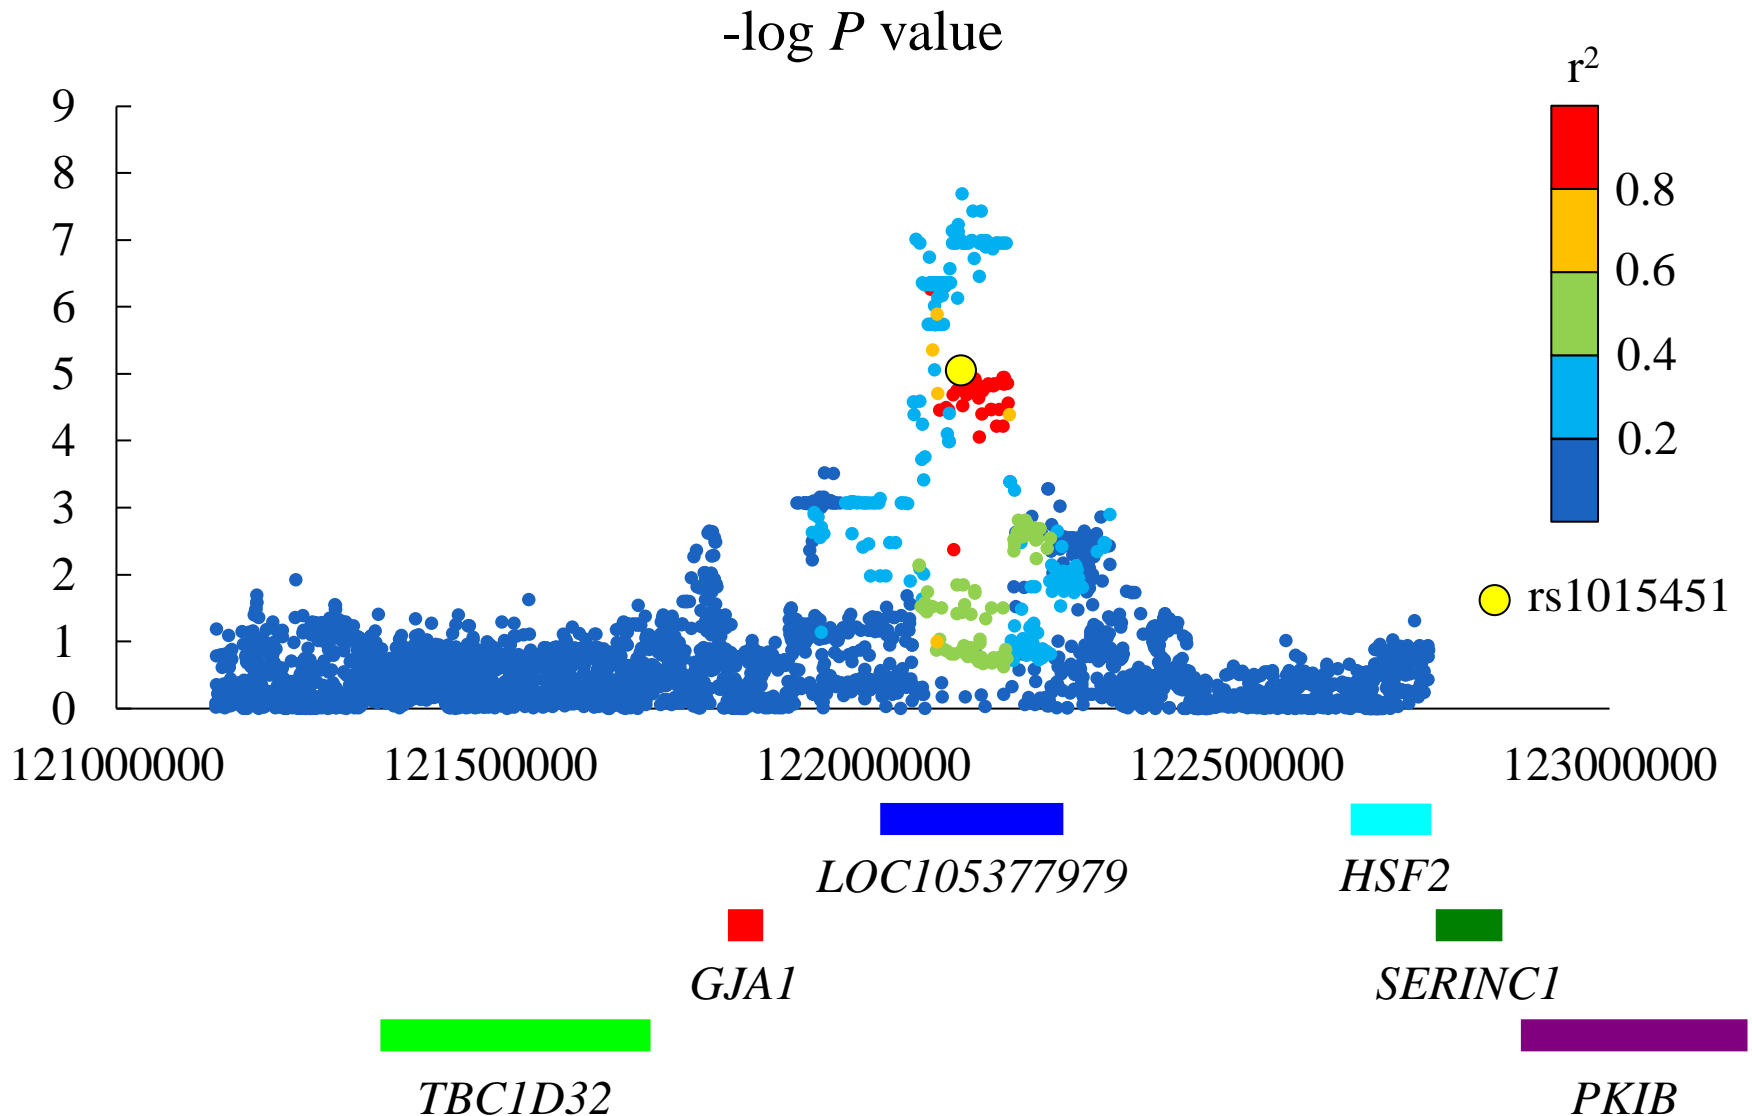

Supplementary Table.

The association between *GJA1* SNP rs1015451 genotype and microRNA serum concentration (log2).

|              | <i>GJA-1</i> Genotypes(T > C) |                 |                | <i>P</i> |
|--------------|-------------------------------|-----------------|----------------|----------|
|              | TT<br>(n = 182)               | TC<br>(n = 253) | CC<br>(n = 95) |          |
| micro RNA    |                               |                 |                |          |
| miR-4708-3p  | 190 ± 147                     | 209 ± 165       | 232 ± 182      | 0.046    |
| miR-4448     | 259 ± 215                     | 272 ± 224       | 324 ± 305      | 0.046    |
| miR-2467-3p  | 271 ± 217                     | 297 ± 243       | 315 ± 245      | 0.134    |
| miR-4648     | 517 ± 1933                    | 335 ± 629       | 316 ± 416      | 0.143    |
| miR-128-1-5p | 1178 ± 778                    | 1220 ± 787      | 1320 ± 840     | 0.176    |
| miR-345-3p   | 307 ± 238                     | 345 ± 321       | 345 ± 303      | 0.189    |
| miR-3177-5p  | 119 ± 58                      | 127 ± 62        | 128 ± 59       | 0.192    |
| miR-4258     | 1547 ± 670                    | 1617 ± 705      | 1654 ± 722     | 0.207    |
| miR-4718     | 131 ± 144                     | 143 ± 174       | 158 ± 184      | 0.219    |
| miR-6840-3p  | 1366 ± 864                    | 1461 ± 899      | 1486 ± 884     | 0.225    |
